# Supplementary material for: Gut microbiota-associated taurine metabolism dysregulation in a mouse model of Parkinson’s disease
Source: PubMed Central journal article supplement (PMC10732050; doi:10.1128/msphere.00431-23), 2023-10-11
Supplement: msphere.00431-23-s0001.pdf [file msphere.00431-23-s0001.pdf]

**Table S1.** Phylum-level distribution of the gut microbiota.

| Species name              | MPTP-Mean(%) | Control-Mean(%) | P-value | Corrected p-value |
|---------------------------|--------------|-----------------|---------|-------------------|
| <i>p__Firmicutes</i>      | 81.66        | 69.11           | 0.027   | 0.069             |
| <i>p__Bacteroidetes</i>   | 1.21         | 22.70           | 0.001   | 0.012             |
| <i>p__Actinobacteria</i>  | 6.10         | 3.67            | 0.091   | 0.198             |
| <i>p__Proteobacteria</i>  | 6.05         | 3.47            | 0.177   | 0.288             |
| <i>p__TM7</i>             | 4.80         | 0.54            | 0.020   | 0.064             |
| <i>p__Tenericutes</i>     | 0.08         | 0.19            | 0.176   | 0.288             |
| <i>p__Deferribacteres</i> | 0.08         | 0.09            | 0.847   | 0.847             |
| <i>p__Verrucomicrobia</i> | 0.01         | 0.11            | 0.004   | 0.026             |

Welch's t-test was used to identify specific bacterial taxa that were dramatically altered ( $P < 0.05$ ) and p-value was for corrected. Taxa that relative abundance contributed  $>1\%$  in both groups were included. Significantly changed taxa were marked with asterisk.

**Table S1.** Class-level distribution of the gut microbiota.

| Species name                     | MPTP-Mean(%) | Control-Mean(%) | P-value | Corrected p-value |
|----------------------------------|--------------|-----------------|---------|-------------------|
| <i>c__Bacilli</i>                | 61.09        | 18.65           | 0.000   | 0.002             |
| <i>c__Erysipelotrichi</i>        | 14.61        | 25.85           | 0.093   | 0.237             |
| <i>c__Clostridia</i>             | 5.96         | 24.61           | 0.000   | 0.000             |
| <i>c__Bacteroidia_p__Bacter</i>  | 1.21         | 22.70           | 0.001   | 0.007             |
| <i>c__Deltaproteobacteria</i>    | 5.47         | 3.02            | 0.208   | 0.362             |
| <i>c__Actinobacteria</i>         | 5.03         | 1.34            | 0.012   | 0.041             |
| <i>c__TM7-3</i>                  | 4.80         | 0.54            | 0.020   | 0.056             |
| <i>c__Coriobacteriia</i>         | 1.07         | 2.33            | 0.011   | 0.041             |
| <i>c__Gammaproteobacteria</i>    | 0.31         | 0.05            | 0.236   | 0.362             |
| <i>c__Betaproteobacteria</i>     | 0.18         | 0.13            | 0.513   | 0.562             |
| <i>c__Mollicutes</i>             | 0.08         | 0.17            | 0.235   | 0.362             |
| <i>c__Alphaproteobacteria</i>    | 0.00         | 0.24            | 0.154   | 0.333             |
| <i>c__Deferribacteres</i>        | 0.08         | 0.09            | 0.847   | 0.885             |
| <i>c__Epsilonproteobacteria</i>  | 0.09         | 0.03            | 0.209   | 0.362             |
| <i>c__Verrucomicrobiae</i>       | 0.01         | 0.11            | 0.004   | 0.026             |
| <i>c__unclassified_k__norank</i> | 0.00         | 0.07            | 0.006   | 0.028             |
| <i>c__4COd-2</i>                 | 0.03         | 0.04            | 0.499   | 0.562             |
| <i>c__Chloroplast</i>            | 0.00         | 0.00            | 0.904   | 0.904             |

Welch's t-test was used to identify specific bacterial taxa that were dramatically altered ( $P < 0.05$ ) and p-value was fdr corrected. Taxa that relative abundance contributed  $>1\%$  in both groups were included. Significantly changed taxa were marked with asterisk.

**Table S1.** Order-level distribution of the gut microbiota.

| Species name                                 | MPTP-Mean(% Control-Mean(% | P-value | Corrected p-value |       |
|----------------------------------------------|----------------------------|---------|-------------------|-------|
| <i>o__Lactobacillales</i>                    | 44.07                      | 18.40   | 0.002             | 0.020 |
| <i>o__Erysipelotrichales</i>                 | 14.61                      | 25.85   | 0.093             | 0.211 |
| <i>o__Clostridiales</i>                      | 5.96                       | 24.61   | 0.000             | 0.000 |
| <i>o__Bacteroidales_c__Bacteroidia</i>       | 1.21                       | 22.70   | 0.001             | 0.015 |
| <i>o__Bacillales</i>                         | 16.35                      | 0.25    | 0.001             | 0.017 |
| <i>o__Desulfovibrionales</i>                 | 5.47                       | 3.02    | 0.208             | 0.339 |
| <i>o__Bifidobacteriales</i>                  | 5.00                       | 1.34    | 0.013             | 0.039 |
| <i>o__CW040</i>                              | 4.80                       | 0.54    | 0.020             | 0.055 |
| <i>o__Coriobacteriales</i>                   | 1.07                       | 2.33    | 0.011             | 0.037 |
| <i>o__Turicibacteriales</i>                  | 0.59                       | 0.00    | 0.004             | 0.024 |
| <i>o__Burkholderiales</i>                    | 0.18                       | 0.13    | 0.513             | 0.545 |
| <i>o__Pseudomonadales</i>                    | 0.31                       | 0.00    | 0.183             | 0.328 |
| <i>o__RF32</i>                               | 0.00                       | 0.23    | 0.153             | 0.318 |
| <i>o__RF39</i>                               | 0.07                       | 0.16    | 0.247             | 0.351 |
| <i>o__Deferribacteriales</i>                 | 0.08                       | 0.09    | 0.847             | 0.873 |
| <i>o__Campylobacteriales</i>                 | 0.09                       | 0.03    | 0.209             | 0.339 |
| <i>o__Verrucomicrobiales</i>                 | 0.01                       | 0.11    | 0.004             | 0.025 |
| <i>o__unclassified_k__norank_d__Bacteria</i> | 0.00                       | 0.07    | 0.006             | 0.029 |
| <i>o__YS2</i>                                | 0.03                       | 0.04    | 0.499             | 0.545 |
| <i>o__Enterobacteriales</i>                  | 0.01                       | 0.05    | 0.070             | 0.170 |
| <i>o__Gemellales</i>                         | 0.05                       | 0.00    | 0.330             | 0.403 |
| <i>o__unclassified_c__Bacilli</i>            | 0.04                       | 0.00    | 0.009             | 0.034 |
| <i>o__Actinomycetales</i>                    | 0.03                       | 0.00    | 0.049             | 0.127 |
| <i>o__unclassified_p__Tenericutes</i>        | 0.00                       | 0.02    | 0.159             | 0.318 |
| <i>o__Anaeroplasmatales</i>                  | 0.00                       | 0.01    | 0.232             | 0.342 |
| <i>o__Mycoplasmatales</i>                    | 0.01                       | 0.00    | 0.007             | 0.030 |

Welch's t-test was used to identify specific bacterial taxa that were dramatically altered ( $P < 0.05$ ) and p-value was fdr corrected. Taxa that relative abundance contributed  $>1\%$  in both groups were included. Significantly changed taxa were marked with asterisk.

**Table S1.** Family-level distribution of the gut microbiota.

| Species name                                           | MPTP-Mean(%) | Control-Mean(%) | P-value | Corrected p-value |
|--------------------------------------------------------|--------------|-----------------|---------|-------------------|
| <i>f__Erysipelotrichaceae</i>                          | 14.61        | 25.85           | 0.093   | 0.203             |
| <i>f__Aerococcaceae</i>                                | 36.60        | 0.15            | 0.000   | 0.006             |
| <i>f__Lactobacillaceae</i>                             | 7.12         | 18.04           | 0.038   | 0.115             |
| <i>f__S24-7</i>                                        | 0.60         | 20.06           | 0.001   | 0.009             |
| <i>f__Lachnospiraceae</i>                              | 1.26         | 17.32           | 0.000   | 0.005             |
| <i>f__Staphylococcaceae</i>                            | 16.34        | 0.24            | 0.001   | 0.015             |
| <i>f__Desulfovibrionaceae</i>                          | 5.47         | 3.02            | 0.208   | 0.319             |
| <i>f__norank_o__Clostridiales</i>                      | 1.78         | 5.16            | 0.064   | 0.175             |
| <i>f__Bifidobacteriaceae</i>                           | 5.00         | 1.34            | 0.013   | 0.056             |
| <i>f__F16</i>                                          | 4.80         | 0.54            | 0.020   | 0.077             |
| <i>f__Coriobacteriaceae</i>                            | 1.07         | 2.33            | 0.011   | 0.053             |
| <i>f__Ruminococcaceae</i>                              | 1.86         | 1.19            | 0.192   | 0.306             |
| <i>f__[Paraprevotellaceae]</i>                         | 0.01         | 1.05            | 0.070   | 0.175             |
| <i>f__Peptostreptococcaceae</i>                        | 0.96         | 0.00            | 0.036   | 0.115             |
| <i>f__Rikenellaceae</i>                                | 0.27         | 0.54            | 0.223   | 0.325             |
| <i>f__Turicibacteraceae</i>                            | 0.59         | 0.00            | 0.004   | 0.030             |
| <i>f__Prevotellaceae</i>                               | 0.01         | 0.54            | 0.027   | 0.094             |
| <i>f__unclassified_o__Clostridiales</i>                | 0.03         | 0.49            | 0.010   | 0.050             |
| <i>f__Streptococcaceae</i>                             | 0.33         | 0.18            | 0.366   | 0.416             |
| <i>f__Bacteroidaceae_o__Bacteroidales</i>              | 0.09         | 0.34            | 0.039   | 0.115             |
| <i>f__Moraxellaceae</i>                                | 0.31         | 0.00            | 0.183   | 0.299             |
| <i>f__norank_o__RF32</i>                               | 0.00         | 0.23            | 0.153   | 0.278             |
| <i>f__norank_o__RF39</i>                               | 0.07         | 0.16            | 0.247   | 0.345             |
| <i>f__[Mogibacteriaceae]</i>                           | 0.02         | 0.17            | 0.001   | 0.015             |
| <i>f__Deferribacteraceae</i>                           | 0.08         | 0.09            | 0.847   | 0.861             |
| <i>f__[Odoribacteraceae]</i>                           | 0.11         | 0.05            | 0.153   | 0.278             |
| <i>f__Alcaligenaceae</i>                               | 0.04         | 0.13            | 0.094   | 0.203             |
| <i>f__Clostridiaceae</i>                               | 0.04         | 0.11            | 0.286   | 0.383             |
| <i>f__Burkholderiaceae</i>                             | 0.14         | 0.00            | 0.037   | 0.115             |
| <i>f__norank_o__Bacteroidales</i>                      | 0.08         | 0.04            | 0.304   | 0.397             |
| <i>f__Helicobacteraceae</i>                            | 0.09         | 0.03            | 0.209   | 0.319             |
| <i>f__Verrucomicrobiaceae</i>                          | 0.01         | 0.11            | 0.004   | 0.033             |
| <i>f__Dehalobacteriaceae</i>                           | 0.01         | 0.09            | 0.088   | 0.203             |
| <i>f__Porphyromonadaceae</i>                           | 0.02         | 0.07            | 0.088   | 0.203             |
| <i>f__unclassified_k__norank_d__Bacteria</i>           | 0.00         | 0.07            | 0.006   | 0.040             |
| <i>f__Christensenellaceae</i>                          | 0.00         | 0.06            | 0.023   | 0.084             |
| <i>f__norank_o__YS2</i>                                | 0.03         | 0.04            | 0.499   | 0.548             |
| <i>f__Enterobacteriaceae</i>                           | 0.01         | 0.05            | 0.070   | 0.175             |
| <i>f__Gemellaceae</i>                                  | 0.05         | 0.00            | 0.330   | 0.397             |
| <i>f__Enterococcaceae</i>                              | 0.00         | 0.03            | 0.000   | 0.005             |
| <i>f__unclassified_c__Bacilli</i>                      | 0.04         | 0.00            | 0.009   | 0.050             |
| <i>f__unclassified_o__Bacteroidales_c__Bacteroidia</i> | 0.02         | 0.02            | 0.848   | 0.861             |
| <i>f__Corynebacteriaceae</i>                           | 0.02         | 0.00            | 0.099   | 0.207             |
| <i>f__Planococcaceae</i>                               | 0.01         | 0.01            | 0.609   | 0.658             |
| <i>f__unclassified_p__Tenericutes</i>                  | 0.00         | 0.02            | 0.159   | 0.280             |
| <i>f__Eubacteriaceae</i>                               | 0.00         | 0.01            | 0.002   | 0.015             |
| <i>f__Anaeroplasmataceae</i>                           | 0.00         | 0.01            | 0.232   | 0.330             |
| <i>f__Mycoplasmataceae</i>                             | 0.01         | 0.00            | 0.007   | 0.042             |
| <i>f__Caulobacteraceae</i>                             | 0.00         | 0.01            | 0.223   | 0.325             |
| <i>f__Carnobacteriaceae</i>                            | 0.01         | 0.00            | 0.149   | 0.278             |
| <i>f__Oxalobacteraceae</i>                             | 0.01         | 0.00            | 0.067   | 0.175             |
| <i>f__norank_c__Alphaproteobacteria</i>                | 0.00         | 0.00            | 0.177   | 0.299             |
| <i>f__Nocardiaceae</i>                                 | 0.00         | 0.00            | 0.016   | 0.067             |
| <i>f__Peptococcaceae</i>                               | 0.00         | 0.00            | 0.150   | 0.278             |
| <i>f__Bacillaceae</i>                                  | 0.00         | 0.00            | 0.181   | 0.299             |
| <i>f__Solibacteraceae</i>                              | 0.00         | 0.00            | 0.343   | 0.397             |
| <i>f__norank_o__Streptophyta</i>                       | 0.00         | 0.00            | 0.904   | 0.904             |
| <i>f__Veillonellaceae</i>                              | 0.00         | 0.00            | 0.260   | 0.355             |
| <i>f__Comamonadaceae</i>                               | 0.00         | 0.00            | 0.138   | 0.278             |
| <i>f__Sphingomonadaceae</i>                            | 0.00         | 0.00            | 0.446   | 0.498             |
| <i>f__Microbacteriaceae</i>                            | 0.00         | 0.00            | 0.626   | 0.666             |
| <i>f__Leuconostocaceae</i>                             | 0.00         | 0.00            | 0.704   | 0.737             |

Welch's t-test was used to identify specific bacterial taxa that were dramatically altered ( $P < 0.05$ ) and p-value was fdr corrected. Taxa that relative abundance contributed  $>1\%$  in both groups were included. Significantly changed taxa were marked with asterisk.

**Table S1.** Genus-level distribution of the gut microbiota.

| Species name                                           | MPTP-Mean(%) | Control-Mean(%) | P-value | Corrected p-value |
|--------------------------------------------------------|--------------|-----------------|---------|-------------------|
| <i>g__Allobaculum</i>                                  | 14.42        | 25.73           | 0.091   | 0.197             |
| <i>g__Aerococcus</i>                                   | 36.55        | 0.12            | 0.000   | 0.016             |
| <i>g__Lactobacillus</i>                                | 7.12         | 18.04           | 0.038   | 0.112             |
| <i>g__norank_f__S24-7</i>                              | 0.60         | 20.06           | 0.001   | 0.020             |
| <i>g__Staphylococcus</i>                               | 15.80        | 0.12            | 0.002   | 0.023             |
| <i>g__Desulfovibrio</i>                                | 5.43         | 2.97            | 0.205   | 0.321             |
| <i>g__norank_f__Lachnospiraceae</i>                    | 0.86         | 7.30            | 0.025   | 0.090             |
| <i>g__norank_o__Clostridiales</i>                      | 1.78         | 5.16            | 0.064   | 0.164             |
| <i>g__unclassified_f__Lachnospiraceae</i>              | 0.01         | 6.60            | 0.011   | 0.058             |
| <i>g__Bifidobacterium</i>                              | 5.00         | 1.34            | 0.013   | 0.061             |
| <i>g__norank_f__F16</i>                                | 4.80         | 0.54            | 0.020   | 0.077             |
| <i>g__Adlercreutzia</i>                                | 0.67         | 2.26            | 0.001   | 0.023             |
| <i>g__unclassified_f__Ruminococcaceae</i>              | 1.72         | 0.08            | 0.003   | 0.033             |
| <i>g__Dorea</i>                                        | 0.00         | 1.04            | 0.025   | 0.090             |
| <i>g__norank_f__Peptostreptococcaceae</i>              | 0.96         | 0.00            | 0.036   | 0.112             |
| <i>g__Coprococcus</i>                                  | 0.30         | 0.63            | 0.134   | 0.247             |
| <i>g__Oscillospira</i>                                 | 0.06         | 0.70            | 0.002   | 0.024             |
| <i>g__norank_f__Rikenellaceae</i>                      | 0.18         | 0.50            | 0.105   | 0.213             |
| <i>g__Jeotgalicoccus</i>                               | 0.53         | 0.11            | 0.040   | 0.112             |
| <i>g__Turcibacter</i>                                  | 0.59         | 0.00            | 0.004   | 0.033             |
| <i>g__Prevotella</i>                                   | 0.01         | 0.54            | 0.027   | 0.090             |
| <i>g__unclassified_o__Clostridiales</i>                | 0.03         | 0.49            | 0.010   | 0.056             |
| <i>g__Bacteroides_f__Bacteroidaceae</i>                | 0.09         | 0.34            | 0.039   | 0.112             |
| <i>g__Streptococcus</i>                                | 0.23         | 0.18            | 0.748   | 0.799             |
| <i>g__norank_f__Coriobacteriaceae</i>                  | 0.32         | 0.07            | 0.011   | 0.056             |
| <i>g__norank_f__Moraxellaceae</i>                      | 0.30         | 0.00            | 0.184   | 0.291             |
| <i>g__norank_f__Ruminococcaceae</i>                    | 0.05         | 0.19            | 0.021   | 0.080             |
| <i>g__norank_o__RF32</i>                               | 0.00         | 0.23            | 0.153   | 0.258             |
| <i>g__norank_o__RF39</i>                               | 0.07         | 0.16            | 0.247   | 0.352             |
| <i>g__Ruminococcus</i>                                 | 0.03         | 0.17            | 0.003   | 0.030             |
| <i>g__norank_f__[Mogibacteriaceae]</i>                 | 0.02         | 0.17            | 0.001   | 0.023             |
| <i>g__Mucispirillum</i>                                | 0.08         | 0.09            | 0.847   | 0.880             |
| <i>g__Sutterella</i>                                   | 0.04         | 0.13            | 0.094   | 0.197             |
| <i>g__Burkholderia</i>                                 | 0.14         | 0.00            | 0.037   | 0.112             |
| <i>g__cc_115</i>                                       | 0.12         | 0.01            | 0.090   | 0.197             |
| <i>g__norank_o__Bacteroidales</i>                      | 0.08         | 0.04            | 0.304   | 0.407             |
| <i>g__Odoribacter</i>                                  | 0.11         | 0.00            | 0.016   | 0.068             |
| <i>g__Akkermansia</i>                                  | 0.01         | 0.11            | 0.004   | 0.036             |
| <i>g__Candidatus_Arthromitus</i>                       | 0.00         | 0.10            | 0.112   | 0.219             |
| <i>g__Roseburia</i>                                    | 0.02         | 0.09            | 0.144   | 0.250             |
| <i>g__Lactococcus</i>                                  | 0.10         | 0.00            | 0.005   | 0.036             |
| <i>g__Dehalobacterium</i>                              | 0.01         | 0.09            | 0.088   | 0.197             |
| <i>g__Blautia</i>                                      | 0.00         | 0.09            | 0.033   | 0.109             |
| <i>g__Parabacteroides</i>                              | 0.02         | 0.07            | 0.088   | 0.197             |
| <i>g__unclassified_f__Coriobacteriaceae</i>            | 0.08         | 0.00            | 0.067   | 0.168             |
| <i>g__AF12</i>                                         | 0.04         | 0.04            | 0.908   | 0.916             |
| <i>g__unclassified_k__norank_d__Bacteria</i>           | 0.00         | 0.07            | 0.006   | 0.042             |
| <i>g__norank_o__YS2</i>                                | 0.03         | 0.04            | 0.499   | 0.571             |
| <i>g__p-75-a5</i>                                      | 0.06         | 0.00            | 0.005   | 0.036             |
| <i>g__[Eubacterium]</i>                                | 0.00         | 0.06            | 0.128   | 0.242             |
| <i>g__Helicobacter</i>                                 | 0.03         | 0.03            | 0.900   | 0.916             |
| <i>g__norank_f__Aerococcaceae</i>                      | 0.05         | 0.01            | 0.041   | 0.112             |
| <i>g__norank_f__Desulfovibrionaceae</i>                | 0.03         | 0.02            | 0.441   | 0.521             |
| <i>g__Rikenella</i>                                    | 0.05         | 0.00            | 0.014   | 0.063             |
| <i>g__Butyricimonas</i>                                | 0.00         | 0.05            | 0.027   | 0.090             |
| <i>g__Gemella</i>                                      | 0.05         | 0.00            | 0.330   | 0.410             |
| <i>g__Faecalibacterium</i>                             | 0.00         | 0.04            | 0.111   | 0.219             |
| <i>g__Flexispira</i>                                   | 0.04         | 0.00            | 0.333   | 0.410             |
| <i>g__Clostridium</i>                                  | 0.04         | 0.00            | 0.046   | 0.121             |
| <i>g__norank_f__Erysipelotrichaceae</i>                | 0.01         | 0.03            | 0.010   | 0.056             |
| <i>g__Enterococcus</i>                                 | 0.00         | 0.03            | 0.000   | 0.011             |
| <i>g__unclassified_c__Bacilli</i>                      | 0.04         | 0.00            | 0.009   | 0.055             |
| <i>g__Christensenella</i>                              | 0.00         | 0.03            | 0.094   | 0.197             |
| <i>g__norank_f__Enterobacteriaceae</i>                 | 0.01         | 0.03            | 0.141   | 0.249             |
| <i>g__unclassified_o__Bacteroidales_c__Bacteroidia</i> | 0.02         | 0.02            | 0.848   | 0.880             |
| <i>g__Bilophila</i>                                    | 0.00         | 0.03            | 0.017   | 0.069             |
| <i>g__norank_f__Christensenellaceae</i>                | 0.00         | 0.03            | 0.085   | 0.197             |
| <i>g__Facklamia</i>                                    | 0.01         | 0.02            | 0.304   | 0.407             |
| <i>g__Corynebacterium</i>                              | 0.02         | 0.00            | 0.099   | 0.203             |
| <i>g__Sporosarcina</i>                                 | 0.01         | 0.01            | 0.609   | 0.683             |
| <i>g__unclassified_f__Helicobacteraceae</i>            | 0.02         | 0.00            | 0.271   | 0.376             |
| <i>g__Coprobacillus</i>                                | 0.01         | 0.01            | 0.234   | 0.342             |
| <i>g__unclassified_f__Erysipelotrichaceae</i>          | 0.01         | 0.01            | 0.484   | 0.559             |
| <i>g__unclassified_p__Tenericutes</i>                  | 0.00         | 0.02            | 0.159   | 0.264             |
| <i>g__Anaerofustis</i>                                 | 0.00         | 0.01            | 0.002   | 0.023             |
| <i>g__Klebsiella</i>                                   | 0.00         | 0.01            | 0.230   | 0.342             |
| <i>g__Anaeroplasma</i>                                 | 0.00         | 0.01            | 0.232   | 0.342             |
| <i>g__norank_f__Mycoplasmataceae</i>                   | 0.01         | 0.00            | 0.007   | 0.045             |
| <i>g__Paraprevotella</i>                               | 0.01         | 0.00            | 0.302   | 0.407             |
| <i>g__unclassified_f__Caulobacteraceae</i>             | 0.00         | 0.01            | 0.223   | 0.342             |
| <i>g__Anaerotruncus</i>                                | 0.00         | 0.00            | 0.759   | 0.803             |
| <i>g__Desemzia</i>                                     | 0.01         | 0.00            | 0.149   | 0.255             |

Welch's t-test was used to identify specific bacterial taxa that were dramatically altered ( $P < 0.05$ ) and p-value was fdr corrected. Taxa that relative abundance contributed >1% in both groups were included.
