# Supplementary material for: Gut microbiota-associated taurine metabolism dysregulation in a mouse model of Parkinson’s disease
Source: PubMed Central journal article supplement (PMC10732050; doi:10.1128/msphere.00431-23), 2023-10-11
Supplement: msphere.00431-23-s0002.pdf [file msphere.00431-23-s0002.pdf]

**Table S2.** All names of species in the Figure31

| Species name                              |
|-------------------------------------------|
| a: g__Corynebacterium                     |
| b: f__Corynebacteriaceae                  |
| c: g__Rhodococcus                         |
| d: f__Nocardiaceae                        |
| e: o__Actinomycetales                     |
| f: g__Bifidobacterium                     |
| g: f__Bifidobacteriaceae                  |
| h: o__Bifidobacteriales                   |
| i: c__Actinobacteria                      |
| j: g__Adlercreutzia                       |
| k: g__norank_f__Coriobacteriaceae         |
| l: g__unclassified_f__Coriobacteriaceae   |
| m: f__Coriobacteriaceae                   |
| n: o__Coriobacteriales                    |
| o: c__Coriobacteriia                      |
| p: g__Bacteroides_f__Bacteroidaceae       |
| q: f__Bacteroidaceae_o__Bacteroidales     |
| r: g__Parabacteroides                     |
| s: f__Porphyromonadaceae                  |
| t: g__Prevotella                          |
| u: f__Prevotellaceae                      |
| v: g__Rikenella                           |
| w: g__norank_f__S24-7                     |
| x: f__S24-7                               |
| y: g__Butyricimonas                       |
| z: g__Odoribacter                         |
| a0: g__[Prevotella]                       |
| a1: f__[Paraprevotellaceae]               |
| a2: o__Bacteroidales_c__Bacteroidia       |
| a3: c__Bacteroidia_p__Bacteroidetes       |
| a4: g__Jeotgaliococcus                    |
| a5: g__Staphylococcus                     |
| a6: f__Staphylococcaceae                  |
| a7: o__Bacillales                         |
| a8: g__Aerococcus                         |
| a9: f__Aerococcaceae                      |
| b0: g__Desemzia                           |
| b1: f__Carnobacteriaceae                  |
| b2: g__Enterococcus                       |
| b3: f__Enterococcaceae                    |
| b4: g__Lactobacillus                      |
| b5: f__Lactobacillaceae                   |
| b6: g__Lactococcus                        |
| b7: o__Lactobacillales                    |
| b8: g__Turicibacter                       |
| b9: f__Turicibacteraceae                  |
| c0: o__Turicibacteriales                  |
| c1: g__unclassified_c__Bacilli            |
| c2: f__unclassified_c__Bacilli            |
| c3: o__unclassified_c__Bacilli            |
| c4: c__Bacilli                            |
| c5: g__Christensenella                    |
| c6: g__norank_f__Christensenellaceae      |
| c7: f__Christensenellaceae                |
| c8: g__Candidatus_Arthromitus             |
| c9: g__Clostridium                        |
| d0: g__Dehalobacterium                    |
| d1: f__Dehalobacteriaceae                 |
| d2: g__Anaerofustis                       |
| d3: f__Eubacteriaceae                     |
| d4: g__Anaerostipes                       |
| d5: g__Blautia                            |
| d6: g__Dorea                              |
| d7: g__Roseburia                          |
| d8: g__[Ruminococcus]                     |
| d9: g__norank_f__Lachnospiraceae          |
| e0: g__unclassified_f__Lachnospiraceae    |
| e1: f__Lachnospiraceae                    |
| e2: g__norank_f__Peptostreptococcaceae    |
| e3: f__Peptostreptococcaceae              |
| e4: g__Faecalibacterium                   |
| e5: g__Oscillospira                       |
| e6: g__Ruminococcus                       |
| e7: g__norank_f__Ruminococcaceae          |
| e8: g__unclassified_f__Ruminococcaceae    |
| e9: g__norank_f__[Mogibacteriaceae]       |
| f0: f__[Mogibacteriaceae]                 |
| f1: g__unclassified_o__Clostridiales      |
| f2: f__unclassified_o__Clostridiales      |
| f3: o__Clostridiales                      |
| f4: c__Clostridia                         |
| f5: g__[Eubacterium]                      |
| f6: g__cc_115                             |
| f7: g__norank_f__Erysipelotrichaceae      |
| f8: g__p-75-a5                            |
| f9: g__norank_o__RF32                     |
| g0: f__norank_o__RF32                     |
| g1: o__RF32                               |
| g2: c__Alphaproteobacteria                |
| g3: g__Sutterella                         |
| g4: f__Alcaligenaceae                     |
| g5: g__Burkholderia                       |
| g6: f__Burkholderiaceae                   |
| g7: g__Herbaspirillum                     |
| g8: g__Bilophila                          |
| g9: g__unclassified_f__Helicobacteraceae  |
| h0: g__norank_f__Moraxellaceae            |
| h1: f__Moraxellaceae                      |
| h2: o__Pseudomonadales                    |
| h3: g__norank_f__F16                      |
| h4: f__F16                                |
| h5: o__CW040                              |
| h6: c__TM7-3                              |
| h7: g__norank_f__Mycoplasmataceae         |
| h8: f__Mycoplasmataceae                   |
| h9: o__Mycoplasmatales                    |
| i0: g__unclassified_p__Tenericutes        |
| i1: f__unclassified_p__Tenericutes        |
| i2: o__unclassified_p__Tenericutes        |
| i3: c__unclassified_p__Tenericutes        |
| i4: g__Akkermansia                        |
| i5: f__Verrucomicrobiaceae                |
| i6: o__Verrucomicrobiales                 |
| i7: c__Verrucomicrobiae                   |
| i8: g__unclassified_k__norank_d__Bacteria |
| i9: f__unclassified_k__norank_d__Bacteria |
| j0: o__unclassified_k__norank_d__Bacteria |
| j1: c__unclassified_k__norank_d__Bacteria |

Cladogram of linear discriminant analysis scores for differentially abundant bacteria (p: Phylum, c: Class, o: Order, f: Family). Only taxa meeting an LDA significant threshold of > 2.0 are showed.
