# Supplementary material for: Gut microbiota-associated taurine metabolism dysregulation in a mouse model of Parkinson’s disease
Source: PubMed Central journal article supplement (PMC10732050; doi:10.1128/msphere.00431-23), 2023-10-11
Supplement: msphere.00431-23-s0003.pdf [file msphere.00431-23-s0003.pdf]

**Table S3.** Distribution of serum metabolites.

| Name                             | rt     | mz     | MPTP-Mean | Control-Mean | VIP  | P-VALUE | FOLD CHANGE |
|----------------------------------|--------|--------|-----------|--------------|------|---------|-------------|
| Ethyl oleate                     | 42.88  | 309.28 | 0.53      | 0.81         | 1.63 | 0.033   | 0.65        |
| Isopalmitic acid                 | 46.65  | 255.23 | 27.45     | 33.32        | 1.45 | 0.047   | 0.82        |
| L-Norleucine                     | 291.27 | 130.09 | 5.02      | 7.51         | 1.52 | 0.039   | 0.67        |
| Nonadecanoic acid                | 43.13  | 297.28 | 0.08      | 0.19         | 1.73 | 0.010   | 0.42        |
| Arachidonic acid                 | 44.64  | 303.23 | 1.72      | 2.26         | 1.66 | 0.019   | 0.76        |
| Alpha-Linolenic acid             | 36.04  | 277.22 | 1.02      | 1.24         | 1.92 | 0.005   | 0.82        |
| 2-Hydroxystearic acid            | 50.18  | 299.26 | 0.05      | 0.09         | 1.92 | 0.020   | 0.59        |
| 9,10-epoxyoctadecanoic acid      | 51.07  | 297.24 | 0.25      | 0.34         | 1.71 | 0.020   | 0.75        |
| Genistein                        | 23.63  | 269.05 | 0.14      | 0.05         | 1.91 | 0.006   | 3.11        |
| Taurocholic acid                 | 199.62 | 514.28 | 0.05      | 0.12         | 1.74 | 0.026   | 0.42        |
| Benzyl acetate                   | 85.71  | 149.06 | 2.98      | 1.73         | 1.74 | 0.036   | 1.73        |
| Mesaconic acid                   | 368.59 | 129.02 | 0.46      | 1.07         | 2.02 | 0.002   | 0.43        |
| Taurine                          | 310.31 | 124.01 | 44.04     | 54.56        | 1.97 | 0.004   | 0.81        |
| Indoleacetaldehyde               | 42.25  | 158.06 | 0.47      | 0.39         | 1.50 | 0.043   | 1.21        |
| Deoxycytidine                    | 220.51 | 226.08 | 0.03      | 0.04         | 1.95 | 0.007   | 0.74        |
| Creatine                         | 364.20 | 130.06 | 0.40      | 0.63         | 1.76 | 0.013   | 0.64        |
| Ethyl tetradecanoate             | 36.05  | 255.23 | 16.96     | 20.14        | 1.63 | 0.039   | 0.84        |
| 17-HDoHE                         | 49.30  | 343.23 | 0.07      | 0.15         | 1.91 | 0.036   | 0.48        |
| Phenyllactic acid                | 113.44 | 165.06 | 0.87      | 0.50         | 1.66 | 0.029   | 1.73        |
| 2-Pyrocatechuic acid             | 24.47  | 153.02 | 2.00      | 1.30         | 1.59 | 0.047   | 1.54        |
| Sinapyl alcohol                  | 78.59  | 209.08 | 0.06      | 0.04         | 1.64 | 0.020   | 1.73        |
| 3-Sulfinato-L-alaninate          | 197.32 | 152.00 | 0.83      | 1.64         | 1.82 | 0.024   | 0.51        |
| L-3-Phenyllactic acid            | 132.22 | 165.06 | 0.14      | 0.08         | 1.56 | 0.039   | 1.78        |
| 1H-Indole-2,3-dione              | 62.99  | 146.02 | 0.11      | 0.17         | 1.54 | 0.032   | 0.64        |
| 3-Sulfinoalanine                 | 176.91 | 152.00 | 0.07      | 0.14         | 1.72 | 0.025   | 0.48        |
| Hydroxypyruvic acid              | 191.30 | 103.00 | 0.01      | 0.02         | 1.54 | 0.030   | 0.72        |
| 2-Hydroxyvaleric acid            | 167.11 | 117.06 | 2.96      | 2.56         | 1.85 | 0.008   | 1.16        |
| Indole-3-propionic acid          | 93.72  | 188.07 | 7.81      | 3.41         | 2.24 | 0.006   | 2.29        |
| 3-Hydroxycaproic acid            | 93.99  | 187.13 | 0.66      | 0.93         | 1.74 | 0.033   | 0.71        |
| Cytidine                         | 254.20 | 242.08 | 0.10      | 0.13         | 1.95 | 0.007   | 0.80        |
| 3-Hydroxyisovaleric acid         | 149.18 | 117.06 | 11.80     | 10.32        | 1.79 | 0.010   | 1.14        |
| Monomethyl glutaric acid         | 145.62 | 145.05 | 0.04      | 0.02         | 1.28 | 0.032   | 2.73        |
| beta-D-Glucosamine               | 408.68 | 214.05 | 0.02      | 0.02         | 1.86 | 0.007   | 0.63        |
| (R)-3-Hydroxy-tetradecanoic acid | 63.48  | 243.20 | 0.22      | 0.07         | 1.96 | 0.001   | 2.98        |
| 6beta-Hydroxyasiatic acid        | 176.38 | 549.34 | 0.02      | 0.01         | 1.94 | 0.005   | 3.36        |

Unpaired two-tailed Student's t test was used to identify specific metabolites that were dramatically altered ( $P < 0.05$ ). Variable importance of projection (VIP) of each metabolite were obtained based on the orthogonal partial least squares discriminant analysis (OPLS-DA) model. Differential metabolites were identified based on  $p < 0.05$  and  $VIP > 1$ .
