# Supplementary material for: Gut microbiota-associated taurine metabolism dysregulation in a mouse model of Parkinson’s disease
Source: PubMed Central journal article supplement (PMC10732050; doi:10.1128/msphere.00431-23), 2023-10-11
Supplement: msphere.00431-23-s0004.pdf [file msphere.00431-23-s0004.pdf]

**Table S4.** Pathway analysis of differential metabolites between PD mice and controls.

| Pathway                                  | Impact | Raw p | -ln(p) | Hited metabolites                         | Counts |
|------------------------------------------|--------|-------|--------|-------------------------------------------|--------|
| Taurine and hypotaurine metabolism*      | 0.7143 | 0.000 | 9.116  | 3-Sulfinoalanine/Taurine/Taurocholic acid | 3.00   |
| Glycine, serine and threonine metabolism | 0.0000 | 0.063 | 2.767  | Hydroxypyruvic acid/Creatine              | 2.00   |
| Pyrimidine metabolism                    | 0.0097 | 0.102 | 2.278  | Cytidine/ Deoxycytidine                   | 2.00   |
| Biosynthesis of unsaturated fatty acids  | 0.0000 | 0.107 | 2.237  | Arachidonic acid/Alpha-Linolenic acid     | 2.00   |
| alpha-Linolenic acid metabolism          | 1.0000 | 0.115 | 2.165  | Alpha-Linolenic acid                      | 1.00   |
| Primary bile acid biosynthesis           | 0.0595 | 0.124 | 2.085  | Taurine/Taurocholic acid                  | 2.00   |
| Glyoxylate and dicarboxylate metabolism  | 0.0645 | 0.217 | 1.528  | Hydroxypyruvic acid                       | 1.00   |
| Cysteine and methionine metabolism       | 0.0253 | 0.308 | 1.178  | 3-Sulfinoalanine                          | 1.00   |
| Arachidonic acid metabolism              | 0.3260 | 0.389 | 0.945  | Arachidonic acid                          | 1.00   |
| Tryptophan metabolism                    | 0.0183 | 0.422 | 0.864  | Indoleacetaldehyde                        | 1.00   |
| Arginine and proline metabolism          | 0.0120 | 0.453 | 0.792  | Creatine                                  | 1.00   |

Enrichment analysis was used to identify significant pathways of differential metabolites. The values of pathway impact were obtained based on the topology analysis. The significance of pathway is assessed by the impact value and *p* value. The most significant pathway was marked with asterisk.
