# Supplementary material for: Gut microbiota-associated taurine metabolism dysregulation in a mouse model of Parkinson’s disease
Source: PubMed Central journal article supplement (PMC10732050; doi:10.1128/msphere.00431-23), 2023-10-11
Supplement: msphere.00431-23-s0006.pdf [file msphere.00431-23-s0006.pdf]

Table S6. Pearson's correlation coefficients and p-values calculated from spearman correlation analysis between PD associated results.

| Domain                       | Kingdom          | Phylum                | Class                             | Order                             | Family                           | Genus            | Species | OTUs  | P-values |       |       |         |         |           |       |           |        |        | Spearman correlation coefficient |        |        |        |        |        |        |        |       |       |       |       |         |    |           |    |           |    |       |        |      |
|------------------------------|------------------|-----------------------|-----------------------------------|-----------------------------------|----------------------------------|------------------|---------|-------|----------|-------|-------|---------|---------|-----------|-------|-----------|--------|--------|----------------------------------|--------|--------|--------|--------|--------|--------|--------|-------|-------|-------|-------|---------|----|-----------|----|-----------|----|-------|--------|------|
|                              |                  |                       |                                   |                                   |                                  |                  |         |       | Open     | Field | Tes   | Rotarod | Test-LH | TH+ cells | ir    | TH+ cells | ir     | Fecal  | pellet                           | Pole   | Test-E | Iba1+  | cell   | r      | GFAP+  | cell   | Colon | histg | Open  | Field | Rotarod | Te | TH+ cells | ir | TH+ cells | ir | Fecal | pellet | Pole |
| d_Bacter_k_norank_d_Bacteria | p_Firmicutes     | c_Bacilli             | o_Lactobacillales                 | f_Aerococcaceae                   | g_Aerococcus                     | s_norank OTU463  |         | 0.000 | 0.002    | 0.000 | 0.000 | 0.000   | 0.002   | 0.000     | 0.000 | 0.000     | 0.000  | 0.000  | 0.000                            | 0.000  | -0.932 | -0.799 | -0.858 | -0.871 | -0.864 | 0.786  | 0.929 | 0.851 | 0.848 |       |         |    |           |    |           |    |       |        |      |
| d_Bacter_k_norank_d_Bacteria | p_Firmicutes     | c_Erysipelotrici      | o_Erysipelotriales                | f_Erysipelotrichaceae             | g_Allobaculum                    | s_norank OTU467  |         | 0.076 | 0.031    | 0.039 | 0.014 | 0.008   | 0.005   | 0.045     | 0.018 | 0.002     | 0.531  | 0.621  | 0.600                            | 0.683  | 0.723  | -0.753 | -0.753 | -0.586 | -0.667 | -0.800 |       |       |       |       |         |    |           |    |           |    |       |        |      |
| d_Bacter_k_norank_d_Bacteria | p_Firmicutes     | c_Bacilli             | o_Lactobacillales                 | f_Lactobacillaceae                | g_Lactobacillus                  | s_norank OTU401  |         | 0.001 | 0.008    | 0.000 | 0.000 | 0.003   | 0.002   | 0.001     | 0.002 | 0.010     | 0.845  | 0.723  | 0.886                            | 0.870  | 0.776  | -0.802 | -0.815 | -0.806 | -0.707 |        |       |       |       |       |         |    |           |    |           |    |       |        |      |
| d_Bacter_k_norank_d_Bacteria | p_Firmicutes     | c_Bacilli             | o_Bacillales                      | f_Staphylococcaceae               | g_Staphylococcus                 | s_sciuri OTU482  |         | 0.050 | 0.022    | 0.040 | 0.006 | 0.015   | 0.000   | 0.016     | 0.005 | 0.001     | -0.577 | -0.652 | -0.599                           | -0.741 | -0.678 | 0.850  | 0.675  | 0.746  | 0.845  |        |       |       |       |       |         |    |           |    |           |    |       |        |      |
| d_Bacter_k_norank_d_Bacteria | p_Firmicutes     | c_Clostridia          | o_Clostridiales                   | f_Lachnospiraceae                 | g_unclassified_f_Lachnospiraceae | s_unclas OTU446  |         | 0.034 | 0.073    | 0.104 | 0.054 | 0.039   | 0.053   | 0.019     | 0.016 | 0.071     | 0.614  | 0.536  | 0.493                            | 0.567  | 0.600  | -0.569 | -0.661 | -0.675 | -0.538 |        |       |       |       |       |         |    |           |    |           |    |       |        |      |
| d_Bacter_k_norank_d_Bacteria | p_Actinobacteria | c_Actinobacteri       | o_Bifidobacteriales               | f_Bifidobacteriaceae              | g_Bifidobacterium                | s_pseudu OTU405  |         | 0.210 | 0.099    | 0.182 | 0.055 | 0.288   | 0.016   | 0.109     | 0.035 | 0.145     | -0.390 | -0.499 | -0.413                           | -0.567 | -0.335 | 0.674  | 0.486  | 0.612  | 0.447  |        |       |       |       |       |         |    |           |    |           |    |       |        |      |
| d_Bacter_k_norank_d_Bacteria | p_Firmicutes     | c_Clostridia          | o_Clostridiales                   | f_Lachnospiraceae                 | g_norank_f_Lachnospiraceae       | s_norank OTU282  |         | 0.015 | 0.000    | 0.100 | 0.006 | 0.010   | 0.028   | 0.009     | 0.006 | 0.070     | 0.678  | 0.883  | 0.498                            | 0.743  | 0.710  | -0.630 | -0.715 | -0.737 | -0.540 |        |       |       |       |       |         |    |           |    |           |    |       |        |      |
| d_Bacter_k_norank_d_Bacteria | p_Firmicutes     | c_Bacilli             | o_Bacillales                      | f_Staphylococcaceae               | g_Staphylococcus                 | s_norank OTU451  |         | 0.005 | 0.005    | 0.021 | 0.010 | 0.008   | 0.011   | 0.007     | 0.007 | 0.027     | -0.749 | -0.745 | -0.655                           | -0.706 | -0.722 | 0.700  | 0.734  | 0.738  | 0.634  |        |       |       |       |       |         |    |           |    |           |    |       |        |      |
| d_Bacter_k_norank_d_Bacteria | p_Firmicutes     | c_Bacilli             | o_Lactobacillales                 | f_Lactobacillaceae                | g_Lactobacillus                  | s_norank OTU470  |         | 0.002 | 0.055    | 0.001 | 0.011 | 0.051   | 0.009   | 0.002     | 0.012 | 0.024     | 0.796  | 0.567  | 0.820                            | 0.700  | 0.575  | -0.718 | -0.805 | -0.694 | -0.643 |        |       |       |       |       |         |    |           |    |           |    |       |        |      |
| d_Bacter_k_norank_d_Bacteria | p_Bacteroidetes  | c_Bacteroidia         | o_Bacteroidia                     | f_S24-7                           | g_norank_f_S24-7                 | s_norank OTU75   |         | 0.004 | 0.010    | 0.031 | 0.011 | 0.067   | 0.015   | 0.001     | 0.005 | 0.043     | 0.764  | 0.710  | 0.622                            | 0.702  | 0.545  | -0.682 | -0.818 | -0.753 | -0.590 |        |       |       |       |       |         |    |           |    |           |    |       |        |      |
| d_Bacter_k_norank_d_Bacteria | p_Firmicutes     | c_Erysipelotrici      | o_Erysipelotriales                | f_Erysipelotrichaceae             | g_Allobaculum                    | s_norank OTU122  |         | 0.084 | 0.352    | 0.131 | 0.312 | 0.468   | 0.771   | 0.209     | 0.409 | 0.766     | -0.519 | -0.295 | -0.462                           | -0.319 | -0.232 | 0.094  | 0.391  | 0.263  | 0.096  |        |       |       |       |       |         |    |           |    |           |    |       |        |      |
| d_Bacter_k_norank_d_Bacteria | p_Proteobacteria | c_Deltaproteobacteria | o_Desulfobacterales               | f_Desulfobacteriaceae             | g_Desulfovibrio                  | s_norank OTU398  |         | 0.024 | 0.006    | 0.148 | 0.021 | 0.026   | 0.047   | 0.012     | 0.007 | 0.084     | 0.644  | 0.743  | 0.445                            | 0.653  | 0.637  | -0.582 | -0.698 | -0.730 | -0.518 |        |       |       |       |       |         |    |           |    |           |    |       |        |      |
| d_Bacter_k_norank_d_Bacteria | p_TM7            | c_TM7-3               | o_CW040                           | f_F36                             | g_norank_f_F36                   | s_norank OTU471  |         | 0.104 | 0.047    | 0.143 | 0.066 | 0.065   | 0.037   | 0.067     | 0.042 | 0.273     | -0.493 | -0.582 | -0.449                           | -0.546 | -0.549 | 0.604  | 0.544  | 0.594  | 0.344  |        |       |       |       |       |         |    |           |    |           |    |       |        |      |
| d_Bacter_k_norank_d_Bacteria | p_Proteobacteria | c_Deltaproteobacteria | o_Desulfobacterales               | f_Desulfobacteriaceae             | g_Desulfovibrio                  | s_C21_c OTU500   |         | 0.025 | 0.033    | 0.040 | 0.039 | 0.221   | 0.043   | 0.037     | 0.024 | 0.568     | -0.639 | -0.615 | -0.599                           | -0.600 | -0.313 | 0.591  | 0.606  | 0.643  | 0.183  |        |       |       |       |       |         |    |           |    |           |    |       |        |      |
| d_Bacter_k_norank_d_Bacteria | p_Bacteroidetes  | c_Bacteroidia         | o_Bacteroidia                     | f_S24-7                           | g_norank_f_S24-7                 | s_norank OTU223  |         | 0.038 | 0.155    | 0.084 | 0.120 | 0.408   | 0.086   | 0.022     | 0.091 | 0.170     | 0.604  | 0.438  | 0.519                            | 0.473  | 0.263  | -0.515 | -0.649 | -0.510 | -0.423 |        |       |       |       |       |         |    |           |    |           |    |       |        |      |
| d_Bacter_k_norank_d_Bacteria | p_Firmicutes     | c_Clostridia          | o_Clostridiales                   | f_Lachnospiraceae                 | g_norank_f_Lachnospiraceae       | s_norank OTU206  |         | 0.145 | 0.033    | 0.165 | 0.064 | 0.108   | 0.163   | 0.166     | 0.140 | 0.242     | 0.447  | 0.616  | 0.428                            | 0.550  | 0.487  | -0.430 | -0.428 | -0.452 | -0.366 |        |       |       |       |       |         |    |           |    |           |    |       |        |      |
| d_Bacter_k_norank_d_Bacteria | p_Firmicutes     | c_Bacilli             | o_Lactobacillales                 | f_Lactobacillaceae                | g_Lactobacillus                  | s_norank OTU447  |         | 0.289 | 0.774    | 0.147 | 0.543 | 0.397   | 0.564   | 0.398     | 0.598 | 0.438     | 0.334  | -0.093 | 0.445                            | 0.195  | 0.269  | -0.186 | -0.269 | -0.170 | -0.247 |        |       |       |       |       |         |    |           |    |           |    |       |        |      |
| d_Bacter_k_norank_d_Bacteria | p_Bacteroidetes  | c_Bacteroidia         | o_Bacteroidia                     | f_S24-7                           | g_norank_f_S24-7                 | s_norank OTU515  |         | 0.219 | 0.067    | 0.050 | 0.071 | 0.320   | 0.056   | 0.010     | 0.054 | 0.108     | 0.663  | 0.545  | 0.576                            | 0.538  | 0.314  | -0.565 | -0.711 | -0.568 | -0.487 |        |       |       |       |       |         |    |           |    |           |    |       |        |      |
| d_Bacter_k_norank_d_Bacteria | p_Firmicutes     | c_Bacilli             | o_Lactobacillales                 | f_Lactobacillaceae                | g_Lactobacillus                  | s_reuteri OTU460 |         | 0.029 | 0.059    | 0.009 | 0.012 | 0.020   | 0.040   | 0.044     | 0.049 | 0.026     | 0.627  | 0.558  | 0.712                            | 0.694  | 0.657  | -0.597 | -0.587 | -0.578 | -0.636 |        |       |       |       |       |         |    |           |    |           |    |       |        |      |
| d_Bacter_k_norank_d_Bacteria | p_Firmicutes     | c_Clostridia          | o_Clostridiales                   | f_Lachnospiraceae                 | g_norank_f_Lachnospiraceae       | s_norank OTU473  |         | 0.055 | 0.471    | 0.026 | 0.082 | 0.037   | 0.053   | 0.064     | 0.050 | 0.069     | 0.567  | 0.231  | 0.637                            | 0.521  | 0.605  | -0.569 | -0.549 | -0.576 | -0.541 |        |       |       |       |       |         |    |           |    |           |    |       |        |      |
| d_Bacter_k_norank_d_Bacteria | p_Firmicutes     | c_Clostridia          | o_Clostridiales                   | f_norank_o_norank_o_Clostridiales | g_norank_o_Clostridiales         | s_norank OTU473  |         | 0.940 | 0.843    | 0.842 | 0.889 | 0.892   | 0.769   | 0.876     | 0.748 | 0.672     | 0.025  | 0.064  | -0.065                           | -0.045 | 0.044  | 0.095  | 0.051  | 0.104  | -0.136 |        |       |       |       |       |         |    |           |    |           |    |       |        |      |
| d_Bacter_k_norank_d_Bacteria | p_Firmicutes     | c_Clostridia          | o_Clostridiales                   | f_Ruminococcaceae                 | g_unclassified_f_Ruminococcaceae | s_unclas OTU408  |         | 0.009 | 0.024    | 0.044 | 0.056 | 0.238   | 0.078   | 0.034     | 0.033 | 0.301     | -0.715 | -0.642 | -0.590                           | -0.564 | -0.369 | 0.528  | 0.612  | 0.615  | 0.326  |        |       |       |       |       |         |    |           |    |           |    |       |        |      |
| d_Bacter_k_norank_d_Bacteria | p_Actinobacteria | c_Coriobacteri        | o_Coriobacteriales                | f_Coriobacteriaceae               | g_Adlercreutzia                  | s_norank OTU440  |         | 0.000 | 0.000    | 0.005 | 0.000 | 0.002   | 0.002   | 0.000     | 0.000 | 0.009     | 0.881  | 0.940  | 0.754                            | 0.863  | 0.801  | -0.798 | -0.803 | -0.858 | -0.717 |        |       |       |       |       |         |    |           |    |           |    |       |        |      |
| d_Bacter_k_norank_d_Bacteria | p_Firmicutes     | c_Erysipelotrici      | o_Erysipelotriales                | f_Erysipelotrichaceae             | g_Allobaculum                    | s_norank OTU402  |         | 0.039 | 0.137    | 0.067 | 0.116 | 0.240   | 0.332   | 0.064     | 0.135 | 0.604     | -0.600 | -0.455 | -0.545                           | -0.478 | -0.367 | 0.307  | 0.549  | 0.467  | 0.167  |        |       |       |       |       |         |    |           |    |           |    |       |        |      |
| d_Bacter_k_norank_d_Bacteria | p_Firmicutes     | c_Clostridia          | o_Clostridiales                   | f_Lachnospiraceae                 | g_norank_f_Lachnospiraceae       | s_norank OTU53   |         | 0.112 | 0.022    | 0.223 | 0.071 | 0.086   | 0.147   | 0.114     | 0.127 | 0.248     | 0.483  | 0.650  | 0.380                            | 0.538  | 0.515  | -0.445 | -0.480 | -0.465 | -0.362 |        |       |       |       |       |         |    |           |    |           |    |       |        |      |
| d_Bacter_k_norank_d_Bacteria | p_Bacteroidetes  | c_Bacteroidia         | o_Bacteroidia                     | f_S24-7                           | g_norank_f_S24-7                 | s_norank OTU304  |         | 0.018 | 0.103    | 0.055 | 0.061 | 0.239   | 0.047   | 0.010     | 0.042 | 0.121     | 0.664  | 0.494  | 0.566                            | 0.554  | 0.368  | -0.581 | -0.708 | -0.594 | -0.473 |        |       |       |       |       |         |    |           |    |           |    |       |        |      |
| d_Bacter_k_norank_d_Bacteria | p_Bacteroidetes  | c_Bacteroidia         | o_Bacteroidia                     | f_S24-7                           | g_norank_f_S24-7                 | s_norank OTU171  |         | 0.004 | 0.007    | 0.052 | 0.011 | 0.022   | 0.028   | 0.002     | 0.006 | 0.042     | 0.756  | 0.727  | 0.573                            | 0.702  | 0.652  | -0.631 | -0.807 | -0.737 | -0.593 |        |       |       |       |       |         |    |           |    |           |    |       |        |      |
| d_Bacter_k_norank_d_Bacteria | p_Firmicutes     | c_Clostridia          | o_Clostridiales                   | f_Lachnospiraceae                 | g_Coproccoccus                   | s_norank OTU446  |         | 0.776 | 0.786    | 0.626 | 0.854 | 0.580   | 0.561   | 0.733     | 0.729 | 0.212     | 0.092  | -0.088 | 0.157                            | 0.060  | 0.178  | 0.187  | -0.110 | -0.112 | -0.388 |        |       |       |       |       |         |    |           |    |           |    |       |        |      |
| d_Bacter_k_norank_d_Bacteria | p_Firmicutes     | c_Bacilli             | o_Lactobacillales                 | f_Lactobacillaceae                | g_Lactobacillus                  | s_unclas OTU79   |         | 0.416 | 0.362    | 0.384 | 0.289 | 0.458   | 0.292   | 0.290     | 0.262 | 0.919     | -0.259 | -0.289 | -0.277                           | -0.334 | -0.237 | 0.332  | 0.332  | 0.352  | 0.033  |        |       |       |       |       |         |    |           |    |           |    |       |        |      |
| d_Bacter_k_norank_d_Bacteria | p_Bacteroidetes  | c_Bacteroidia         | o_Bacteroidia                     | f_S24-7                           | g_norank_f_S24-7                 | s_norank OTU449  |         | 0.013 | 0.077    | 0.008 | 0.028 | 0.244   | 0.037   | 0.015     | 0.060 | 0.088     | 0.689  | 0.529  | 0.725                            | 0.629  | 0.365  | -0.606 | -0.682 | -0.557 | -0.513 |        |       |       |       |       |         |    |           |    |           |    |       |        |      |
| d_Bacter_k_norank_d_Bacteria | p_Bacteroidetes  | c_Bacteroidia         | o_Bacteroidia                     | f_S24-7                           | g_norank_f_S24-7                 | s_norank OTU419  |         | 0.007 | 0.038    | 0.018 | 0.030 | 0.191   | 0.025   | 0.003     | 0.023 | 0.057     | 0.734  | 0.603  | 0.666                            | 0.625  | 0.405  | -0.639 | -0.775 | -0.646 | -0.562 |        |       |       |       |       |         |    |           |    |           |    |       |        |      |
| d_Bacter_k_norank_d_Bacteria | p_Firmicutes     | c_Bacilli             | o_Bacillales                      | f_Staphylococcaceae               | g_Staphylococcus                 | s_unclas OTU486  |         | 0.005 | 0.004    | 0.012 | 0.002 | 0.004   | 0.001   | 0.003     | 0.002 | 0.001     | -0.748 | -0.768 | -0.696                           | -0.789 | -0.761 | 0.836  | 0.779  | 0.805  | 0.812  |        |       |       |       |       |         |    |           |    |           |    |       |        |      |
| d_Bacter_k_norank_d_Bacteria | p_Bacteroidetes  | c_Bacteroidia         | o_Bacteroidia                     | f_S24-7                           | g_norank_f_S24-7                 | s_norank OTU292  |         | 0.035 | 0.194    | 0.049 | 0.118 | 0.440   | 0.082   | 0.026     | 0.109 | 0.156     | 0.610  | 0.403  | 0.577                            | 0.475  | 0.247  | -0.522 | -0.638 | -0.487 | -0.436 |        |       |       |       |       |         |    |           |    |           |    |       |        |      |
| d_Bacter_k_norank_d_Bacteria | p_Clostridia     | o_Clostridiales       | f_norank_o_norank_o_Clostridiales | g_norank_o_Clostridiales          | s_norank OTU324                  |                  | 0.021   | 0.248 | 0.004    | 0.031 | 0.073 | 0.029   | 0.034   | 0.056     | 0.070 | 0.654     | 0.362  | 0.758  | 0.621                            | 0.536  | -0.627 | -0.610 | -0.695 | -0.687 | -0.555 |        |       |       |       |       |         |    |           |    |           |    |       |        |      |
| d_Bacter_k_norank_d_Bacteria | p_Bacteroidetes  | c_Bacteroidia         | o_Bacteroidia                     | f_S24-7                           | g_norank_f_S24-7                 | s_norank OTU286  |         | 0.020 | 0.112    | 0.055 | 0.044 | 0.042   | 0.035   | 0.012     | 0.014 | 0.061     | 0.658  | 0.483  | 0.567                            | 0.590  | 0.593  | -0.610 | -0.695 | -0.687 | -0.555 |        |       |       |       |       |         |    |           |    |           |    |       |        |      |
| d_Bacter_k_norank_d_Bacteria | p_Firmicutes     | c_Bacilli             | o_Bacillales                      | f_Staphylococcaceae               | g_Staphylococcus                 | s_psych OTU474   |         | 0.021 | 0.010    | 0.042 | 0.015 | 0.013   | 0.010   | 0.016     | 0.011 | 0.019     | -0.653 | -0.710 | -0.592                           | -0.682 | -0.691 | 0.708  | 0.675  | 0.701  | 0.664  |        |       |       |       |       |         |    |           |    |           |    |       |        |      |
| d_Bacter_k_norank_d_Bacteria | p_Actinobacteria | c_Coriobacteri        | o_Coriobacteriales                | f_Coriobacteriaceae               | g_Adlercreutzia                  | s_norank OTU498  |         | 0.117 | 0.095    | 0.135 | 0.073 | 0.404   | 0.027   | 0.099     | 0.042 | 0.220     | -0.477 | -0.503 | -0.457                           | -0.535 | -0.266 | 0.635  | 0.499  | 0.592  | 0.382  |        |       |       |       |       |         |    |           |    |           |    |       |        |      |
| d_Bacter_k_norank_d_Bacteria | p_Actinobacteria | c_Coriobacteri        | o_Coriobacteriales                | f_Coriobacteriaceae               | g_Adlercreutzia                  | s_norank OTU491  |         | 0.002 | 0.000    | 0.021 | 0.001 | 0.004   | 0.006   | 0.001     | 0.001 | 0.019     | 0.800  | 0.948  | 0.653                            | 0.825  | 0.763  | -0.735 | -0.832 | -0.815 | -0.662 |        |       |       |       |       |         |    |           |    |           |    |       |        |      |
| d_Bacter_k_norank_d_Bacteria | p_Firmicutes     | c_Bacilli             | o_Turicibacterales                | f_Turicibacteriaceae              | g_Turicibacter                   | s_norank OTU495  |         | 0.003 | 0.051    | 0.009 | 0.026 | 0.058   | 0.155   | 0.008     | 0.041 | 0.167     | -0.780 | -0.574 | -0.715                           | -0.637 | -0.561 | 0.473  | 0.732  | 0.596  | 0.426  |        |       |       |       |       |         |    |           |    |           |    |       |        |      |
| d_Bacter_k_norank_d_Bacteria | p_Proteobacteria | c_Gammaproteobacteria | o_Pseudomonadales                 | f_Moraxellaceae                   | g_norank_f_Moraxellaceae         | s_norank OTU503  |         | 0.519 | 0.342    | 0.304 | 0.128 | 0.102   | 0.062   | 0.252     | 0.186 | 0.0       |        |        |                                  |        |        |        |        |        |        |        |       |       |       |       |         |    |           |    |           |    |       |        |      |
