# Supplementary material for: Gut microbiota-associated taurine metabolism dysregulation in a mouse model of Parkinson’s disease
Source: mSphere. 2023 Oct 11;8(6):e00431-23. doi: 10.1128/msphere.00431-23 (PMC10732050; doi:10.1128/msphere.00431-23)
Supplement: Table S5 — Pearson's correlation coefficients and P values calculated from Spearman correlation analysis between top 50 genera and PD associated results. [file msphere.00431-23-s0005.pdf]

**Table S5.** Pearson's correlation coefficients and p-values calculated from spearman correlation analysis between Top 50 genera and PD associated results

[illegible]
